# Supplementary material for: Thermoelectrochemical formation of Fe/Fe3C@hollow N-doped carbon in molten salts for enhanced catalysis
Source: Royal Society of Chemistry journal article supplement (doi:10.1039/d0ta00565g), 2020-01-01
Supplement: d0ta00565g1.pdf [file d0ta00565g1.pdf]

## **Electronic Supplementary Information (ESI)**

### **Thermoelectrochemical Formation of Fe/Fe<sub>3</sub>C@Hollow N-Doped Carbon in Molten Salts for Enhanced Catalysis**

Wei Weng,<sup>ac</sup> Jing Zhou,<sup>b</sup> Dong Gu<sup>b</sup> and Wei Xiao<sup>a\*</sup>

- a. College of Chemistry and Molecular Sciences, Hubei Key Laboratory of Electrochemical Power Sources, Wuhan University, Wuhan 430072 (P. R. China)
- b. The Institute of Advanced Studies, Wuhan University, Wuhan 430072 (P. R. China)
- c. School of Resource and Environmental Sciences, Hubei International Scientific and Technological Cooperation Base of Sustainable Resource and Energy, Wuhan University, Wuhan 430072 (P. R. China)

\* Email: [00030042@whu.edu.cn](mailto:00030042@whu.edu.cn)      Homepage: <http://wxiao.whu.edu.cn/>

## Experimental Details

*Materials:* NaCl (anhydrous, 99% purity) and CaCl<sub>2</sub> (anhydrous, 99% purity) were purchased from Shanghai Titan Scientific Co. Ltd. Tris (hydroxymethyl) aminomethane (Tris, >99.99%) was obtained from the Shanghai Regal Biology Technology Co. Ltd. Dopamine hydrochloride (>99%) was provided by the Hefei Bomei Biotechnology. Co. Ltd. FeCl<sub>3</sub> (Analytical reagent, 99.9% in purity) was purchased from the Aladdin (Shanghai, China). H<sub>2</sub>O<sub>2</sub> (30 wt%) was purchased from Sinopharm Chemical Reagent Co., Ltd. Sodium phosphate monobasic (NaH<sub>2</sub>PO<sub>4</sub>, >99.0 %), commercial Pt/C (20 wt% Pt), and 5 wt% Nafion solution were purchased from Sigma-Aldrich.

*Preparation of Fe<sub>2</sub>O<sub>3</sub>@PDA:* The preparation of Fe<sub>2</sub>O<sub>3</sub> was carried out according to a previous report.<sup>1</sup> 2.7 g FeCl<sub>3</sub> was dissolved in 500 mL of deionized (DI) water, followed by adding 27 mg NaH<sub>2</sub>PO<sub>4</sub>. After stirring for 1 h, the mixture was sealed in a Teflon-lined stainless-steel autoclave, followed by heating at 105 °C for 48 h. Then, Fe<sub>2</sub>O<sub>3</sub> nanospindles (Fig. S1a and c) were obtained after centrifugation in DI water and ethanol for several times and vacuum-drying at 60 °C overnight. 200 mg Fe<sub>2</sub>O<sub>3</sub> nanospindles were added into 200 mL (10 mM) Tris buffer solution, followed by addition of 200 mg dopamine hydrochloride. After stirring for 20 h at room temperature, the Fe<sub>2</sub>O<sub>3</sub>@PDA powders (Fig. S1b and d) were collected by centrifugation in DI water and ethanol for several times and vacuum-drying at 60 °C for overnight.<sup>2, 3</sup>

*Reaction mechanism investigation:* Pyrolysis of Fe<sub>2</sub>O<sub>3</sub>@PDA in the inert Argon atmosphere is conducted at 600 °C for 2 h (denoted as 0 V, 2 h in air). For comparison, pyrolysis of Fe<sub>2</sub>O<sub>3</sub>@PDA is also conducted in the NaCl-CaCl<sub>2</sub> molten salt at 600 °C for 2 h (denoted as 0 V, 2 h in molten salt). To better understand the reaction mechanism, the above-mentioned pyrolysis products were only leached in DI water for 12 h to remain all iron intermediates, followed by vacuum-drying at 60 °C overnight. Similarly, products obtained by electrochemical treatment of Fe<sub>2</sub>O<sub>3</sub>@PDA in the NaCl-CaCl<sub>2</sub> molten salt at 2.1 V for 2 h are also leached in DI water for 12 h to remain all iron

species in some cases, followed by vacuum-drying at 60 °C overnight (denoted as 2.1 V, 2 h in molten salt). The gaseous products during the pyrolysis of  $\text{Fe}_2\text{O}_3@\text{PDA}$  in Ar atmosphere were analyzed by a gas chromatograph (GC-2014C plus, Shimadzu, Japan) equipped with a thermal conductivity detector (TCD), two flame ionization detectors (FID-1 and FID-2) and a chromatographic column (Rtx-1).

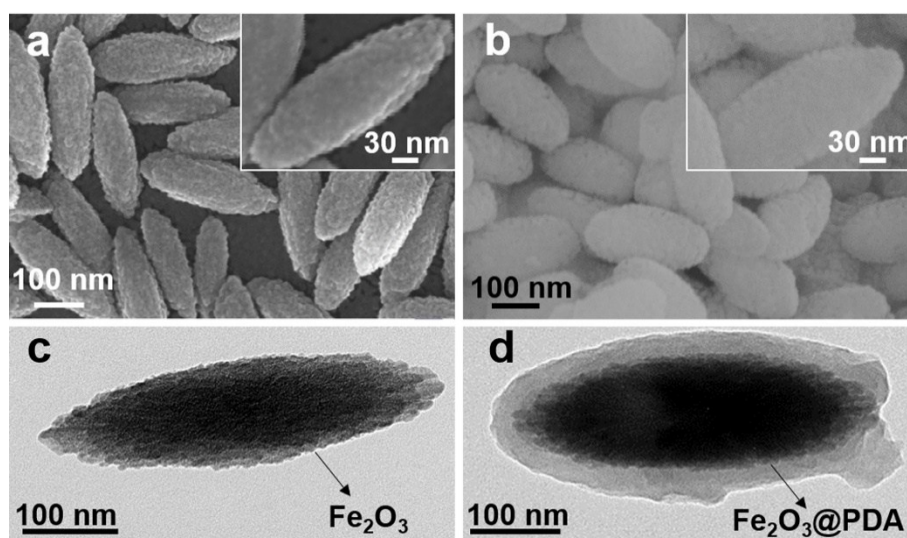

**Fig. S1** SEM (a,b) and TEM (c,d) images for  $\text{Fe}_2\text{O}_3$  (a,c) and  $\text{Fe}_2\text{O}_3@\text{PDA}$  (b,d).

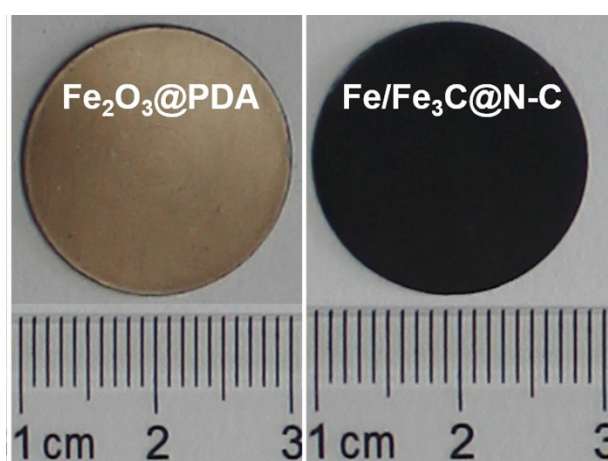

**Fig. S2** Optical images of the  $\text{Fe}_2\text{O}_3@\text{PDA}$  pellet before electrolysis (left) and the obtained  $\text{Fe}/\text{Fe}_3\text{C}@\text{N-C}$  pellets after electrolysis (right).

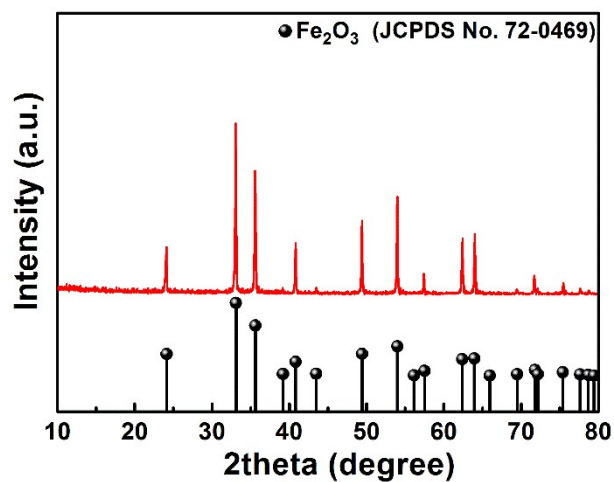

**Fig. S3** XRD pattern of the  $\text{Fe}_2\text{O}_3@\text{PDA}$ .

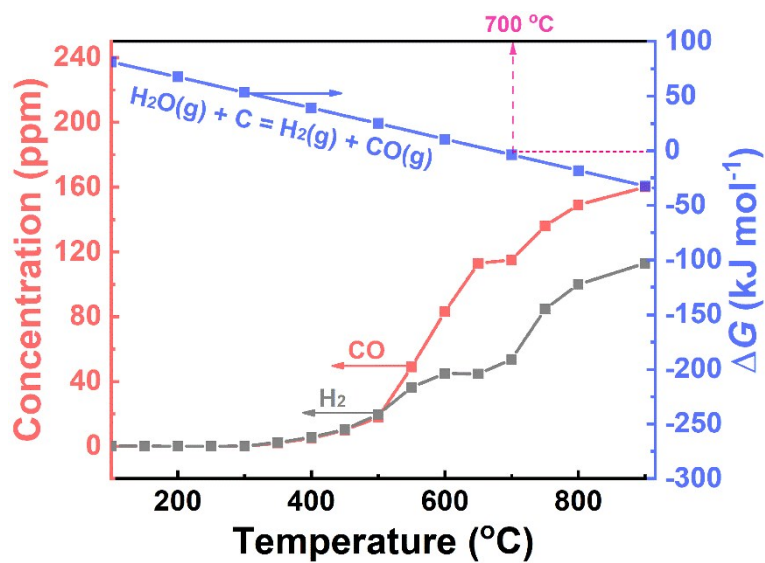

**Fig. S4** Concentration variations of  $\text{H}_2$  and  $\text{CO}$  during the pyrolysis process of PDA in Ar atmosphere ( $5\text{ }^\circ\text{C min}^{-1}$ ) as well as the Gibbs free energy changes (calculated by HSC 6.1) of reaction  $\text{H}_2\text{O (g)} + \text{C} = \text{H}_2\text{ (g)} + \text{CO (g)}$ .

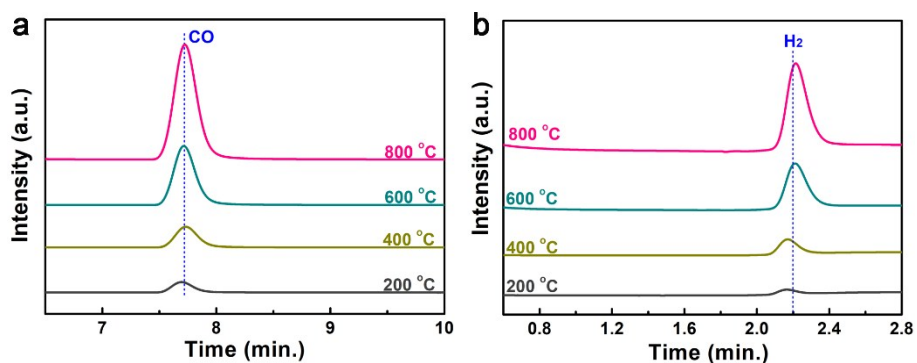

**Fig. S5** GC spectra of the outlet gas during the pyrolysis process of PDA in Ar atmosphere: (a) CO; (b) H<sub>2</sub>. Both the H<sub>2</sub> and CO are detected by a thermal conductivity detector (TCD).

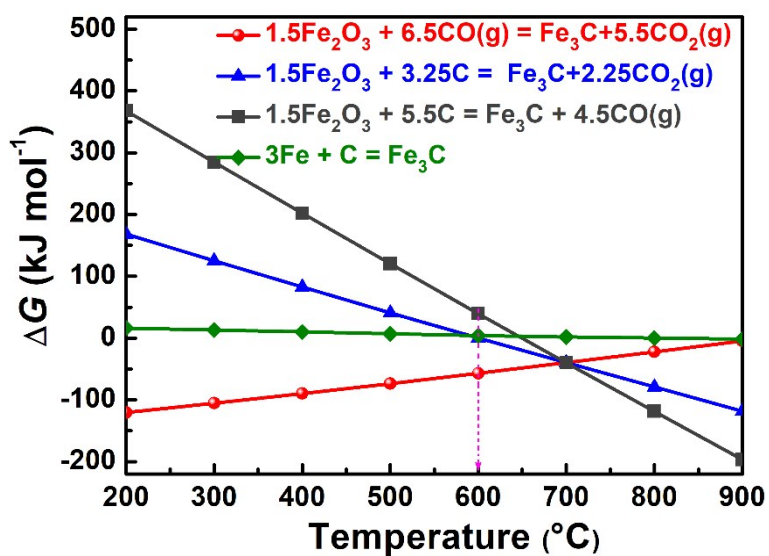

**Fig. S6** Gibbs free energy changes of possible reactions for Fe<sub>3</sub>C formation (calculated by HSC 6.1 software).

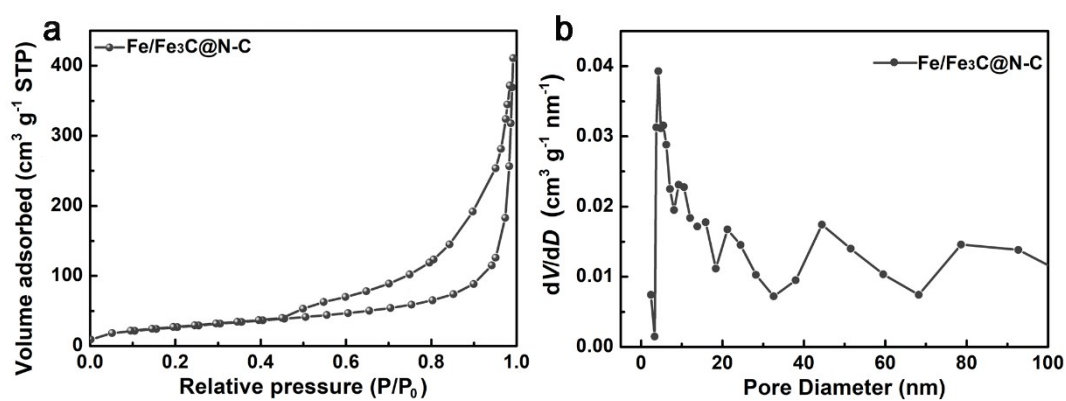

**Fig. S7** Nitrogen adsorption-desorption isotherm (a) and pore size distribution (b).

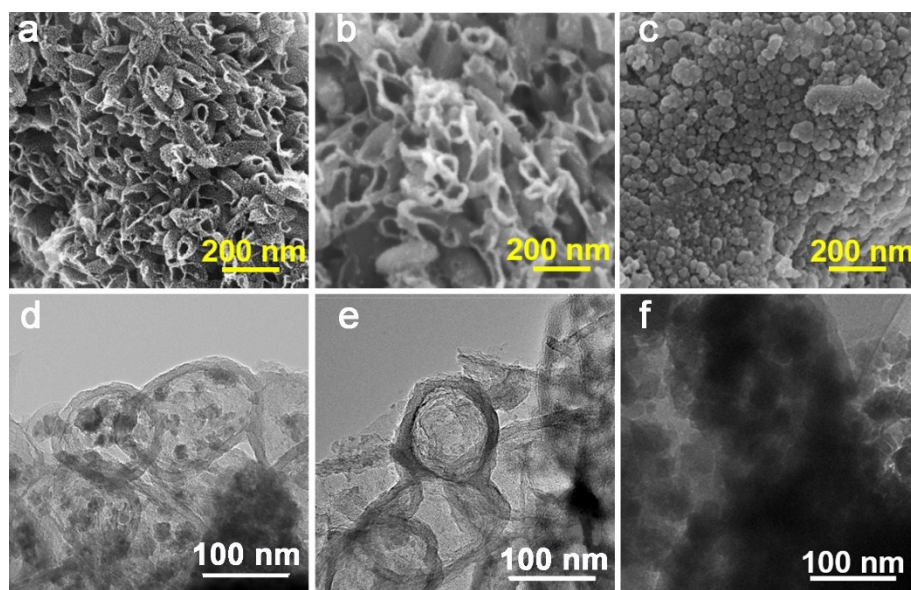

**Fig. S8** SEM (a-c) and TEM (d-f) images for Fe/Fe<sub>3</sub>C@N-C (a,d), N-C (b,e), and Fe/Fe<sub>3</sub>C (c,f).

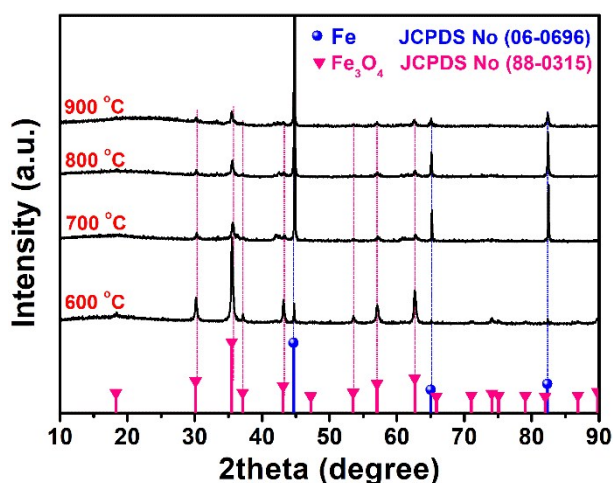

**Fig. S9** XRD patterns for the pyrolysis product of  $\text{Fe}_2\text{O}_3@\text{PDA}$  in Ar atmosphere at different temperatures. Reaction time: 2 h. The obtained products were only leached in deionized water for 12 h to remain all iron intermediates, followed by vacuum-drying at 60 °C overnight.

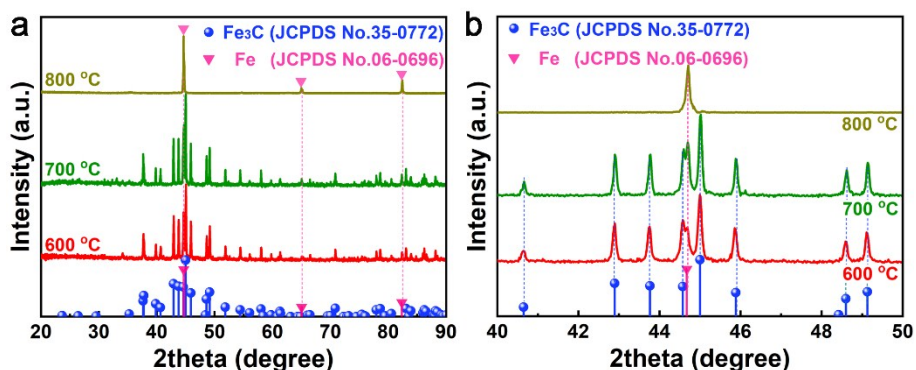

**Fig. S10** XRD patterns of the products obtained by electrochemical treatments of  $\text{Fe}_2\text{O}_3@\text{PDA}$  in  $\text{NaCl-CaCl}_2$  molten salt at 2.1 V for 2 h at different temperatures. The products were only leached in deionized water for 12 h to remain all iron species, followed by vacuum-drying at 60 °C overnight. The 2theta degree presented is in the range of 20-90° for (a) and 40-50° for (b).



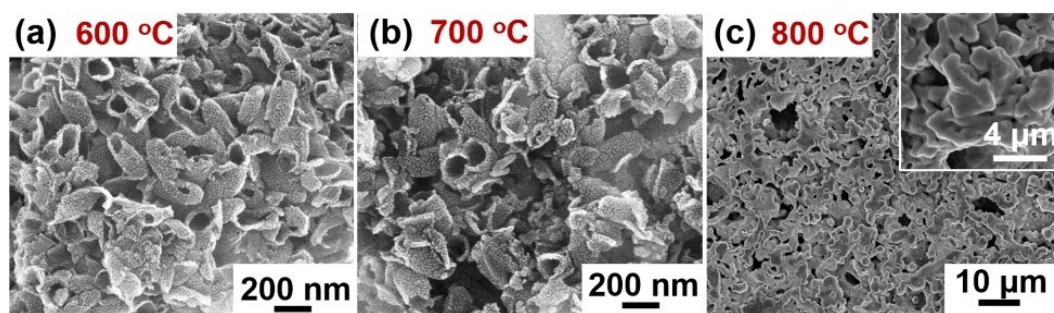

**Fig. S11** SEM images for the products obtained at different temperatures from electrochemical treatment of Fe<sub>2</sub>O<sub>3</sub>@PDA pellets in NaCl-CaCl<sub>2</sub> molten salt at 2.1 V for 2 h. (a) 600 °C; (b) 700 °C; (c) 800 °C.

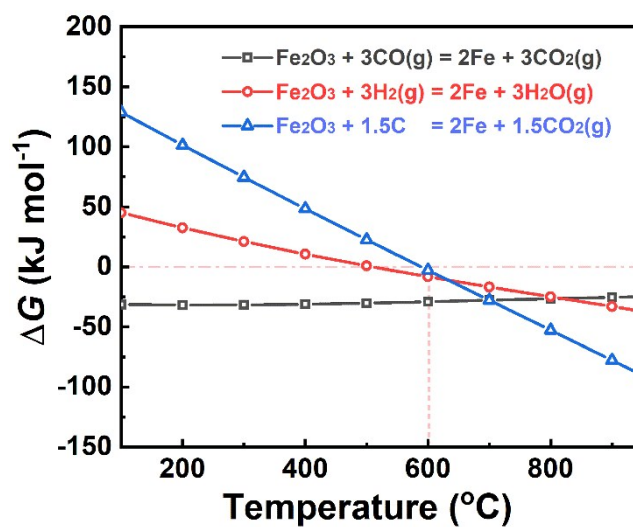

**Fig. S12** Gibbs free energy changes (calculated by HSC 6.1 software) of related reactions for Fe formation.



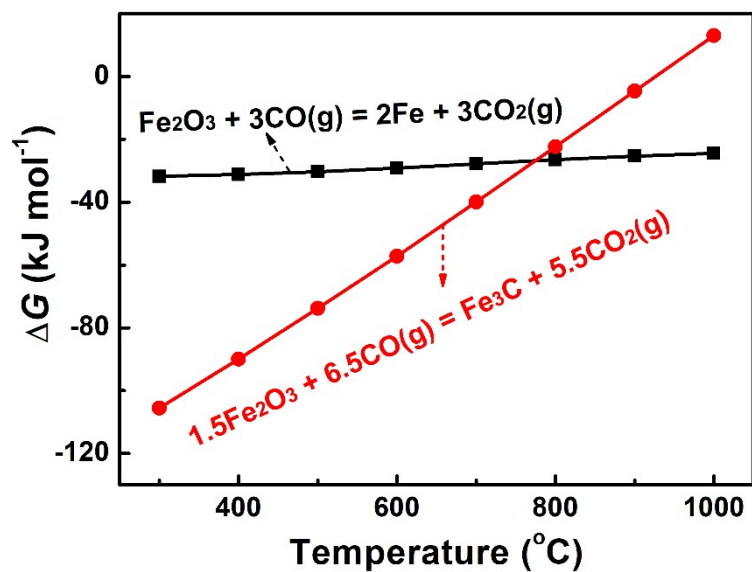

**Fig. S13** Gibbs free energy changes (calculated by HSC 6.1 software) for reactions between CO and  $\text{Fe}_2\text{O}_3$ .

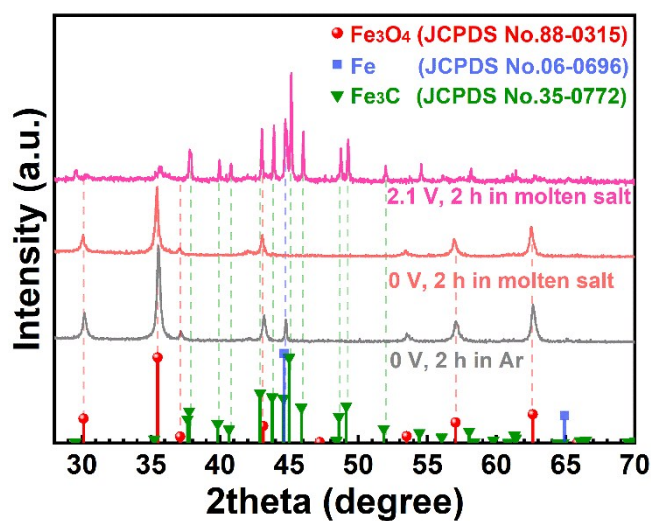

**Fig. S14** XRD patterns of products obtained by treatment of  $\text{Fe}_2\text{O}_3@\text{PDA}$  at 600  $^{\circ}\text{C}$  in three different ways. Products were only leached in deionized water, without washing in acid solution. (0 V means that no voltage is exerted.)

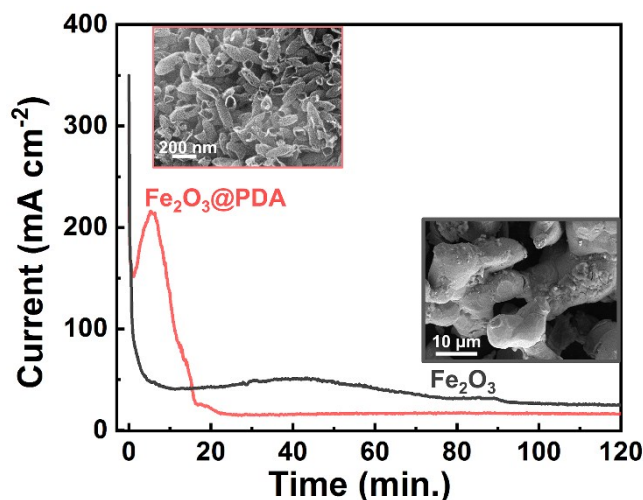

**Fig. S15** Current-time curves for electrolysis of  $\text{Fe}_2\text{O}_3@\text{PDA}$  and  $\text{Fe}_2\text{O}_3$  spindles. Insets are the SEM images of products obtained from the electrolysis of  $\text{Fe}_2\text{O}_3@\text{PDA}$  (left) and  $\text{Fe}_2\text{O}_3$  (right) spindles. Electrolysis voltage: 2.1 V. Electrolysis time: 120 min.

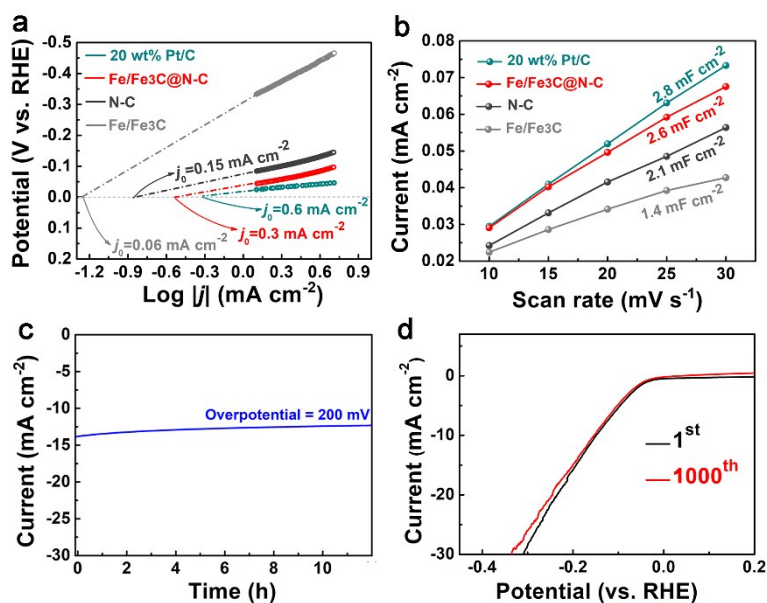

**Fig. S16** HER performance of  $\text{Fe}/\text{Fe}_3\text{C}@\text{N-C}$  measured in 0.5 M  $\text{H}_2\text{SO}_4$  solution: (a) calculation of exchange current density, (b) linear relationship between the capacitance current density and the scan rate, (c) long-term stability test performed under a constant overpotential of 200 mV, and (d) LSV curves of the first and 1000<sup>th</sup> repeated cycles at 10 mV  $\text{s}^{-1}$ .

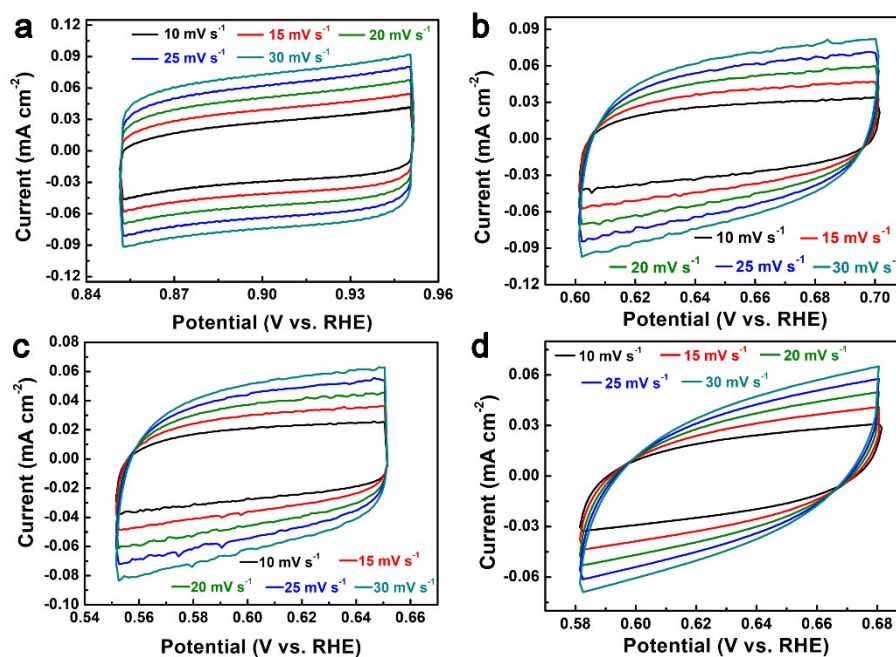

**Fig. S17** CV curves of the 20 wt% Pt/C (a), Fe/Fe<sub>3</sub>C@N-C (b), N-C (c), and Fe/Fe<sub>3</sub>C (d) in non-Faraday regions at different scan rate in 0.5 M H<sub>2</sub>SO<sub>4</sub> solution.

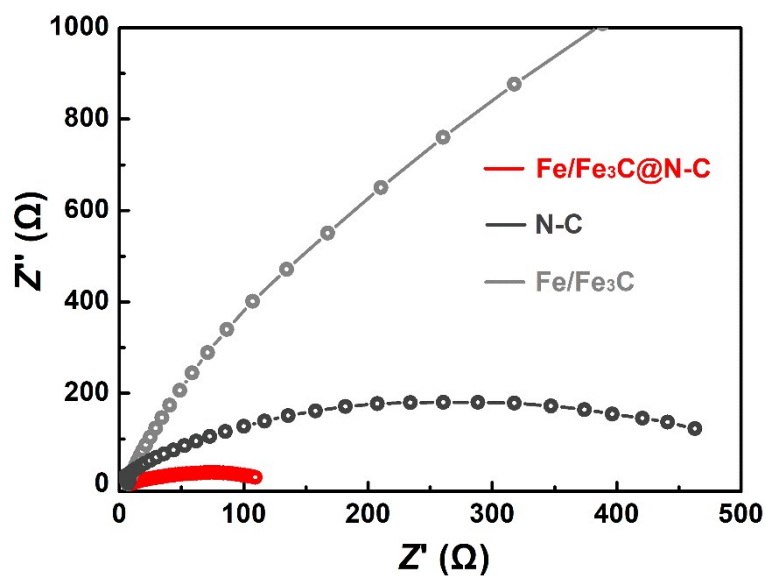

**Fig. S18** Nyquist plots recorded at a HER overpotential of 150 mV in 0.5 M H<sub>2</sub>SO<sub>4</sub>.

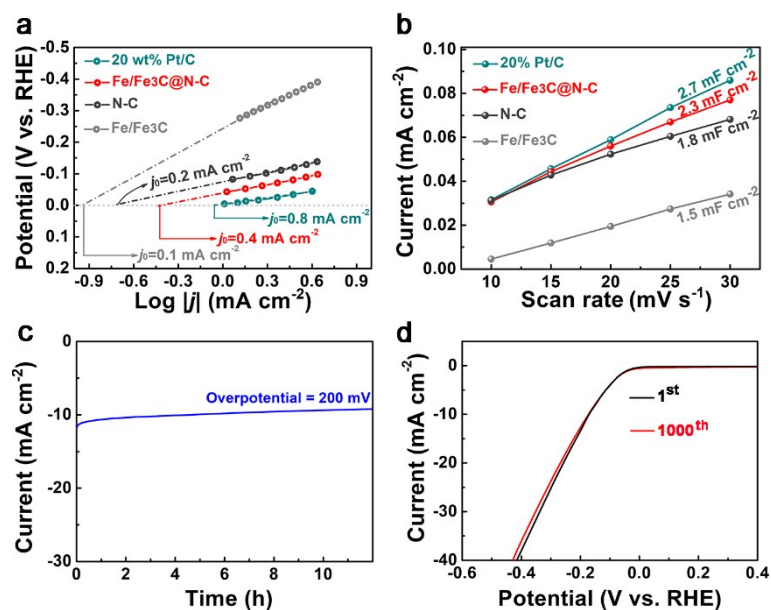

**Fig. S19** Hydrogen evolution reaction performance of electrocatalysts measured in 1 M KOH solution: (a) calculation of exchange current density, (b) linear relationship between the capacitance current density and the scan rate, (c) long-term stability test performed under constant overpotential of 200 mV, and (d) LSV curves of the first and 1000<sup>th</sup> repeated cycles at 10 mV s<sup>-1</sup>.

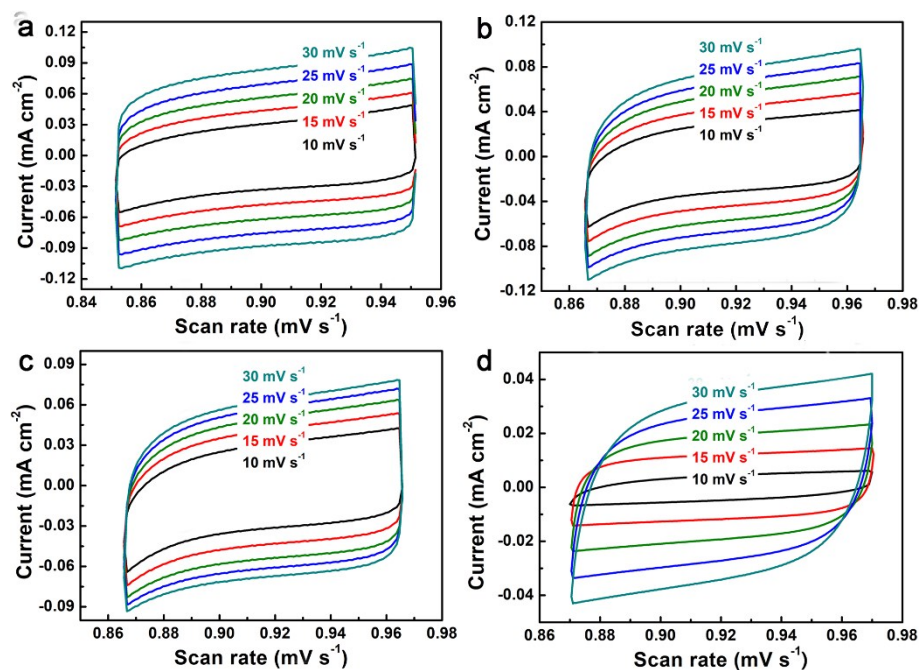

**Fig. S20** CV curves of the 20 wt% Pt/C (a), Fe/Fe<sub>3</sub>C@N-C (b), N-C (c), and Fe/Fe<sub>3</sub>C (d) in non-Faraday regions at different scan rate in 1 M KOH solution.

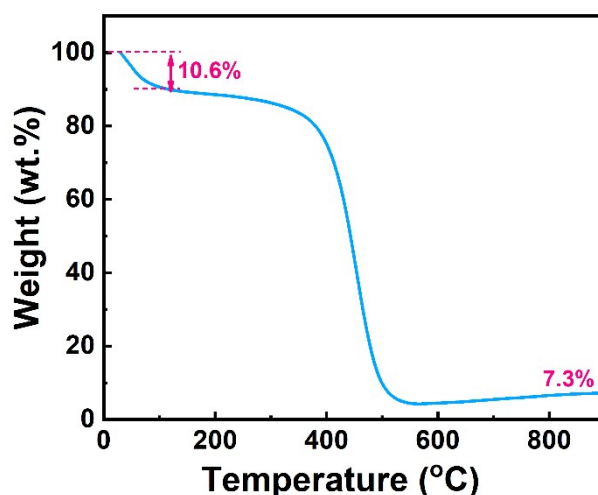

**Fig. S21** TGA curve of Fe/Fe<sub>3</sub>C@N-C (obtained at 600 °C) with a heating rate of 5 °C min<sup>-1</sup> in air.

As shown in Figure S21, the weight loss (10.6 wt%) before 100 °C is attributed to the adsorbed water. Both the combustion of carbon and oxidation of Fe/Fe<sub>3</sub>C species exist in the temperature range of 300~550 °C, leading to an obvious weight loss. Only oxidation of the remaining Fe/Fe<sub>3</sub>C particles occurs at temperatures exceeding 550 °C, resulting a slight weight increase. The weight keeps almost constant when the temperature is higher than 800 °C, meaning that all carbon is depleted by combustion and all Fe/Fe<sub>3</sub>C particles are converted to Fe<sub>2</sub>O<sub>3</sub> by oxidation. Therefore, the 7.3 wt% mass in the final stage reflects the weight ratio of Fe<sub>2</sub>O<sub>3</sub>, which means that the mass ratio of Fe atom in Fe/Fe<sub>3</sub>C@N-C is 5.7 wt%. The mass loading on the RDE electrode (5 mm in diameter) is 0.45 mg cm<sup>-2</sup>, meaning that the number of Fe atom on the electrode is 9×10<sup>-8</sup> mol. The N content is determined to be 0.8 wt% by XPS survey spectrum. Assuming that Fe/Fe<sub>3</sub>C@N-C are consisted of C, N, and Fe elements, then the atomic ratio of Fe in Fe/Fe<sub>3</sub>C@N-C is calculated to be 1.3 at% by the following equation:

$$\text{Fe}_{(\text{at.}\%) } = \frac{\frac{m_{\text{Fe}}}{M_{\text{Fe}}}}{\frac{m_{\text{Fe}}}{M_{\text{Fe}}} + \frac{m_{\text{N}}}{M_{\text{N}}} + \frac{m_{\text{C}}}{M_{\text{C}}}} = \frac{\frac{5.7}{56}}{\frac{5.7}{56} + \frac{0.8}{14} + \frac{93.5}{12}} = 1.3 \text{ at}\%$$

Considering the Fe atom is the center of active sites <sup>[11-13]</sup>, then the Turnover Frequency

(TOF, the amount of H<sub>2</sub> per mol Fe per second) is calculated by the following equation:

$$TOF = \frac{j * A}{2 * F * m}$$

where  $j$  (A cm<sup>-2</sup>) is the current density at a specific overpotential (here the selected overpotential is 300 mV),  $A$  is the electrode area of RDE (0.196 cm<sup>2</sup>), 2 (mol) represents the electrons consumed for generating one mole of H<sub>2</sub>,  $m$  is the number of Fe atoms ( $9 \times 10^{-8}$  mol).  $F$  is the Faraday's constant (96485 C mol<sup>-1</sup>).

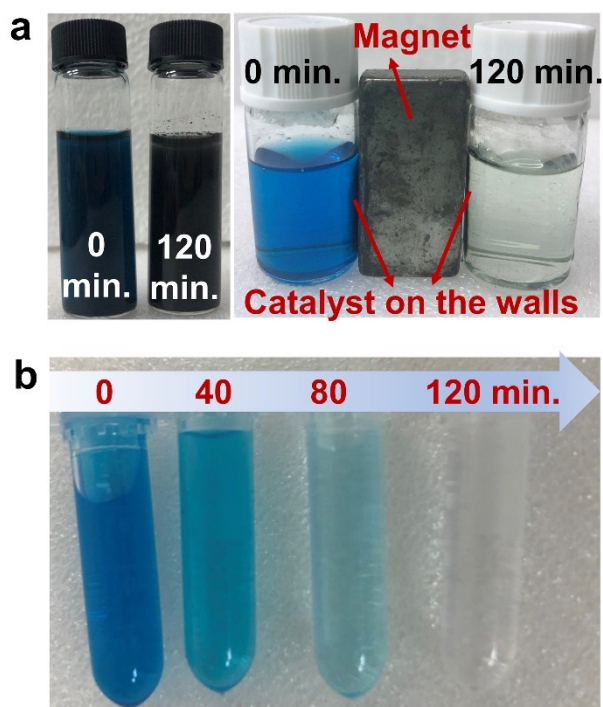

**Fig. S22** (a) Optical images for the Fe/Fe<sub>3</sub>C@N-C catalysts in the MB-containing solutions after degradation for 0 or 120 min. (The left two bottles: without a magnet; The right two bottles: with a magnet). (b) Optical images of the MB-containing solutions after degradation by Fe/Fe<sub>3</sub>C@N-C for different times.



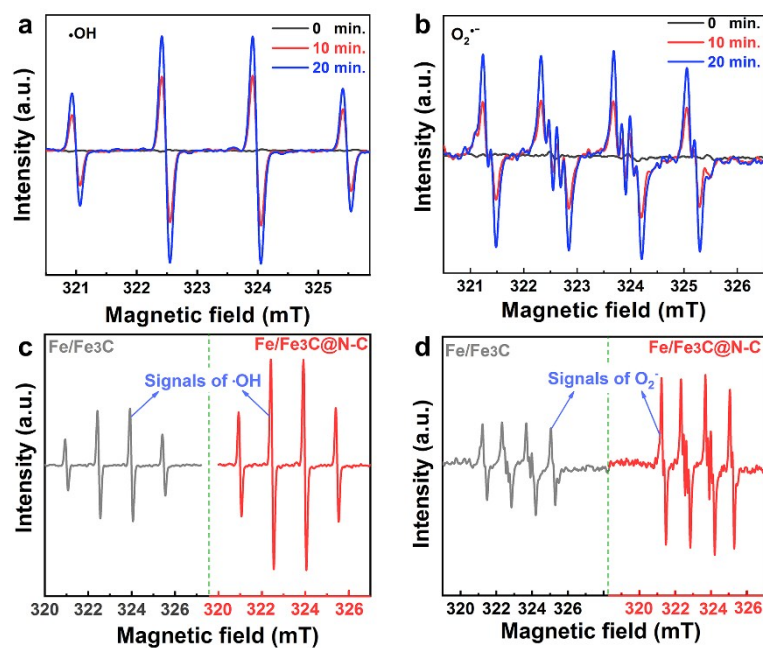

**Fig. S23** The time-dependent variation of electronspin resonance (ESR) signals of (a) hydroxyl radical ( $\cdot\text{OH}$ ) and (b) superoxide ( $\text{O}_2^{\cdot-}$ ) radical detected during degradation of MB by Fe/Fe<sub>3</sub>C@N-C. Comparison of  $\cdot\text{OH}$  (c) and  $\text{O}_2^{\cdot-}$  (d) signals detected by ESR during degradation of MB by Fe/Fe<sub>3</sub>C and Fe/Fe<sub>3</sub>C@N-C.



**Table S1.** Comparison of HER performances between recently reported literatures and this work

| Catalysts                                              | Electrolyte                          | $\eta_{@10 \text{ mA cm}^{-2}}$<br>(mV) | Tafel slope<br>(mV dec <sup>-1</sup> ) | $j_0$<br>(mA cm <sup>-2</sup> ) | Refs.     |
|--------------------------------------------------------|--------------------------------------|-----------------------------------------|----------------------------------------|---------------------------------|-----------|
| Fe/Fe <sub>3</sub> C@N-C                               | 0.5 M H <sub>2</sub> SO <sub>4</sub> | 147                                     | 78                                     | 0.3                             | This work |
|                                                        | 1 M KOH                              | 153                                     | 91                                     | 0.4                             |           |
| Fe <sub>3</sub> C-Co/N-C                               | 0.5 M H <sub>2</sub> SO <sub>4</sub> | 298                                     | 100.3                                  | -                               | [4]       |
|                                                        | 1 M KOH                              | 238                                     | 108.8                                  | -                               |           |
| (Fe <sub>0.75</sub> Co <sub>0.25</sub> )C <sub>2</sub> | 1 M KOH                              | 174                                     | 107                                    | -                               | [5]       |
| Fe-N-C                                                 | 0.5 M H <sub>2</sub> SO <sub>4</sub> | 130                                     | 89                                     | 0.027                           | [6]       |
| Fe <sub>3</sub> C encased in graphene nanoribbons      | 0.5 M H <sub>2</sub> SO <sub>4</sub> | 49                                      | 46                                     | -                               | [7]       |
| Co <sub>2</sub> FeC <sub>x</sub> N <sub>y</sub>        | 0.5 M H <sub>2</sub> SO <sub>4</sub> | 180                                     | 90                                     | -                               | [8]       |
| Fe <sub>x</sub> P in N-P codoped carbon                | 0.5 M H <sub>2</sub> SO <sub>4</sub> | 227                                     | 81                                     | 0.023                           | [9]       |
| FeCo in N-doped carbon nanotube                        | 0.5 M H <sub>2</sub> SO <sub>4</sub> | 284                                     | 72                                     | -                               | [10]      |
| FeCo in N-doped graphene                               | 0.5 M H <sub>2</sub> SO <sub>4</sub> | 262                                     | 74                                     | -                               | [11]      |
| Ni-doped FeP/carbon hollow nanorods                    | 0.5 M H <sub>2</sub> SO <sub>4</sub> | 72                                      | 54                                     | 0.723                           | [12]      |
|                                                        | 1 M KOH                              | 95                                      | 72                                     | -                               |           |
| FeP/carbon hollow nanorods                             | 0.5 M H <sub>2</sub> SO <sub>4</sub> | 157                                     | 127                                    | 0.594                           | [12]      |
| Mo <sub>2</sub> C nanobelts                            | 0.5 M H <sub>2</sub> SO <sub>4</sub> | 140                                     | 51.3                                   | 0.021                           | [13]      |
|                                                        | 1 M KOH                              | 110                                     | 49.7                                   | 0.056                           |           |
| MoC-Mo <sub>2</sub> C in porous N-doped carbon         | 1 M KOH                              | 121                                     | 60                                     | 0.15                            | [14]      |
| WC-W <sub>2</sub> C in porous N-doped carbon           | 1 M KOH                              | 101                                     | 90                                     | 0.74                            | [14]      |
| N-doped Mo <sub>2</sub> C                              | 0.5 M H <sub>2</sub> SO <sub>4</sub> | 177.5                                   | 59.6                                   | 0.010                           | [15]      |
| S-vacancy MoS <sub>2</sub>                             | 0.5 M H <sub>2</sub> SO <sub>4</sub> | 194                                     | 73                                     | -                               | [16]      |

## Supplementary References

- 1 C. Zeng, W. Weng, T. Lv and W. Xiao, *ACS Appl. Mater. Interfaces*, **2018**, 10, 30470-30478.
- 2 W. Weng, C. Zeng and W. Xiao, *ACS Appl. Mater. Interfaces*, **2019**, 11, 9156-9163.
- 3 X. Xin, H. Qin, H. P. Cong and S. H. Yu, *Langmuir*, **2018**, 34, 4952-4961.
- 4 C. C. Yang, S. F. Zai, Y. T. Zhou, L. Du and Q. Jiang, *Adv. Funct. Mater.*, **2019**, 29, 1901949.
- 5 S. Li, P. Ren, C. Yang, X. Liu, Z. Yin, W. Li, H. Yang, J. Li, X. Wang, Y. Wang, R. Cao, L. Lin, S. Yao, X. Wen and D. Ma, *Sci. Bull.*, **2018**, 63, 1358-1363.
- 6 X. Zeng, J. Shui, X. Liu, Q. Liu, Y. Li, J. Shang, L. Zheng and R. Yu, *Adv. Energy Mater.*, **2018**, 8, 1701345.
- 7 X. Fan, Z. Peng, R. Ye, H. Zhou and X. Guo, *ACS Nano*, **2015**, 9, 7407-7418.
- 8 P. Liu, Y. Liu, J. Jiang, S. Ashraf, X. Wu, G. Han, J. Gao, K. Zhang and B. Li, *ACS Sustai. Chem. Eng.*, **2019**, 7, 8744-8754.
- 9 Y. Cheng, J. Guo, Y. Huang, Z. Liao and Z. Xiang, *Nano Energy*, **2017**, 35, 115-120.
- 10 J. Deng, P. Ren, D. Deng, L. Yu, F. Yang and X. Bao, *Energy Environ. Sci.*, **2014**, 7, 1919-1923.
- 11 Y. Yang, Z. Lun, G. Xia, F. Zheng, M. He and Q. Chen, *Energy Environ. Sci.*, **2015**, 8, 3563-3571.
- 12 X. F. Lu, L. Yu and X. W. Lou, *Sci. Adv.*, **2019**, 5, eaav6009.
- 13 S. Jing, L. Zhang, L. Luo, J. Lu, S. Yin, P. K. Shen and P. Tsiakaras, *Appl. Catal. B-Environ.*, **2018**, 224, 533-540.
- 14 X. F. Lu, L. Yu, J. Zhang and X. W. D. Lou, *Adv. Mater.*, **2019**, 31, e1900699.
- 15 R. Jiang, J. Fan, L. Hu, Y. Dou, X. Mao and D. Wang, *Electrochim. Acta*, **2018**, 261, 578-587.
- 16 W. Wu, C. Niu, C. Wei, Y. Jia, C. Li and Q. Xu, *Angew. Chem. Int. Edit.*, **2019**, 58, 2029-2033.
